# Supplementary material for: Selective basic etching of bifunctional core–shell composite particles for the fabrication of organic functionalized hollow mesoporous silica nanospheres
Source: Royal Society of Chemistry journal article supplement (doi:10.1039/c5nj02906f), 2015-11-20
Supplement: c5nj02906f1.pdf [file c5nj02906f1.pdf]

## Selective Etching of Bifunctional Core-Shell Composite

### Particles for Fabrication of Organic Functionalized

### Hollow Mesoporous Silica Nanospheres

Zhenhui Liu<sup>a</sup>, Lianxi Chen<sup>a,b\*</sup>, Xinshan Ye<sup>b</sup>, Huogen Yu<sup>a</sup>, Jie Li<sup>a,c</sup>, Fanlong Zeng<sup>a</sup>

<sup>a</sup> School of Chemistry, Chemical Engineering and Life Sciences, Wuhan University of Technology, Wuhan, 430070, P. R. China.

<sup>b</sup> Stake Key Laboratory of Natural and Biomimetic Drugs, Peking University.

<sup>c</sup> School of Materials Science and Engineering, Wuhan University of Technology, Wuhan, 430070, P. R. China

#### Supporting Information:

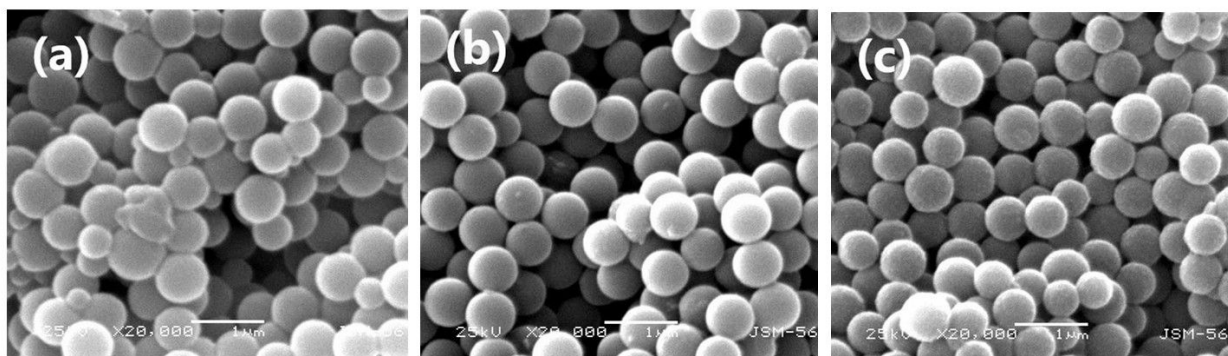

**Fig. S1** SEM images of organic functionalized SiO<sub>2</sub> nanospheres synthesized from: a) CTES, b) VTES, c) MPTMS[ $\bar{r}$ =1000nm].

<sup>a</sup> School of Chemistry, Chemical Engineering and Life Sciences, Wuhan University of Technology, Wuhan, 430070, P. R. China.

<sup>b</sup> Stake Key Laboratory of Natural and Biomimetic Drugs, Peking University.

<sup>c</sup> School of Materials Science and Engineering, Wuhan University of Technology, Wuhan, 430070, P. R. China

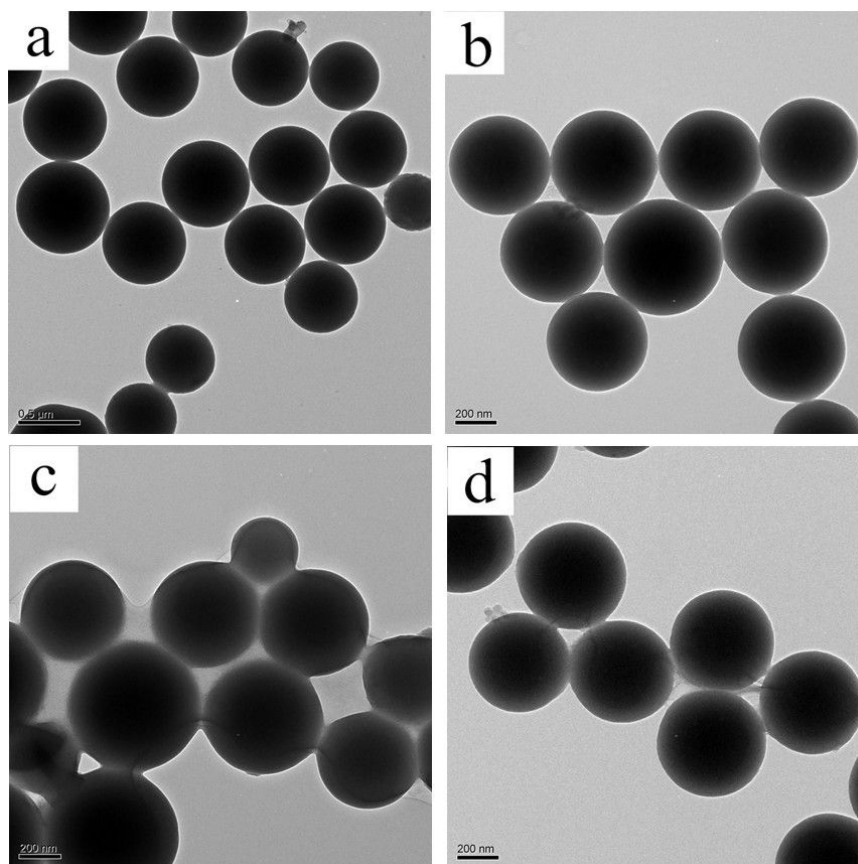

Fig. S2. TEM images of cyano-SiO<sub>2</sub>@thiol-SiO<sub>2</sub>(a,b) and vinyl-SiO<sub>2</sub>@thiol-SiO<sub>2</sub>(c,d) composite particles

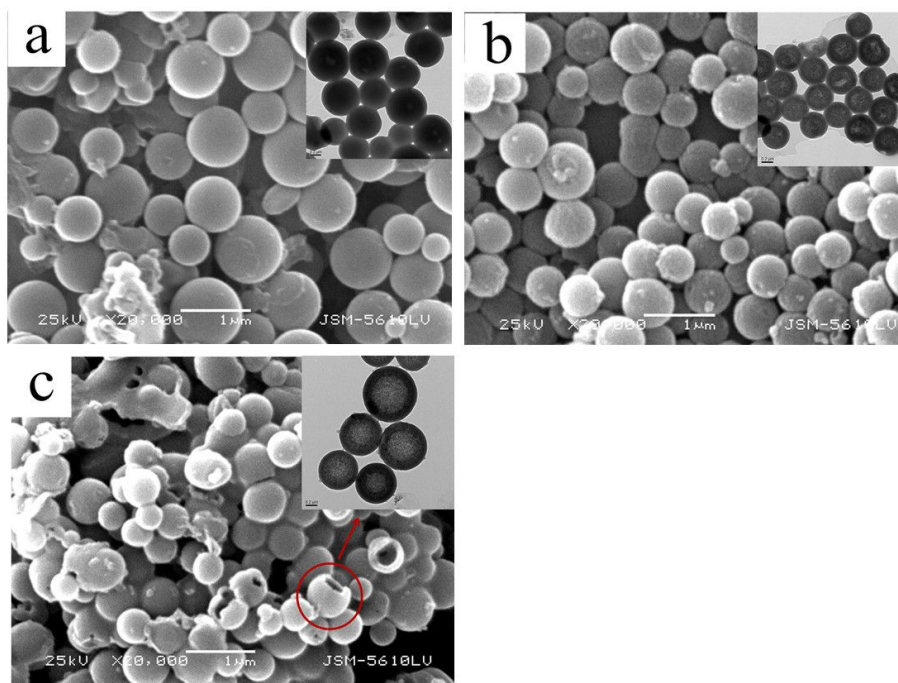

**Fig. S3** SEM images and corresponding TEM images show the effect of  $\text{Na}_2\text{CO}_3$  concentration on the conversion of cyano- $\text{SiO}_2$ @thiol- $\text{SiO}_2$  to T-HMSNs. The  $\text{Na}_2\text{CO}_3$  concentration used were (a,b) 0.06 M, (c,d) 0.12 M, (e,f) 0.24 M. All the other reaction conditions are the same: 50 °C for 12 h[bar=1000nm].

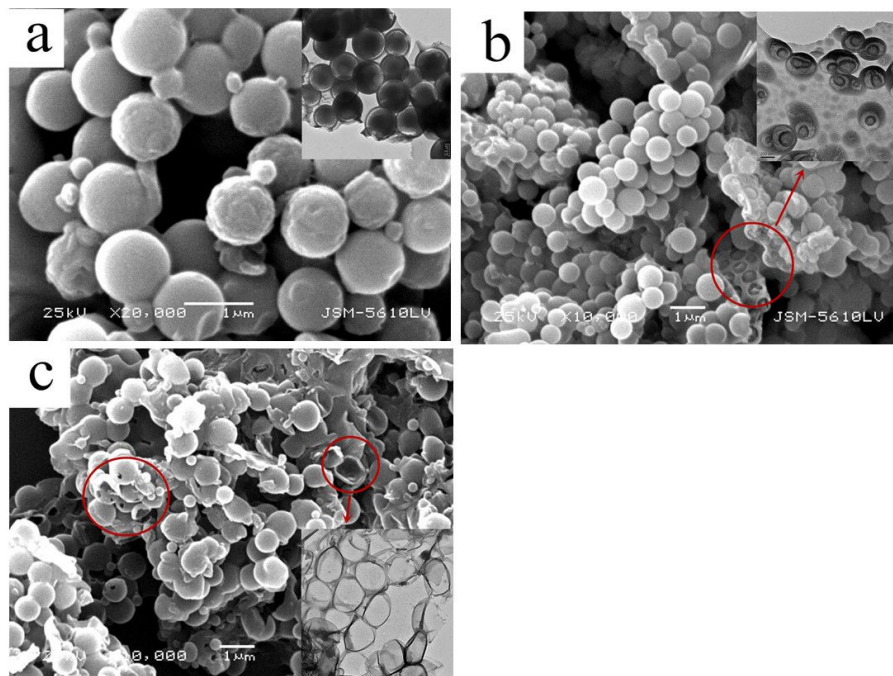

**Fig. S4** SEM and TEM images show the effect of NaOH concentration on the conversion of cyano- $\text{SiO}_2$ @thiol- $\text{SiO}_2$  to T-HMSNs. The NaOH concentration used were (a) 0.04 M, (c,d) 0.08 M, (e,f) 0.16 M. All the other reaction conditions are the same: 50 °C for 12 h[bar=1000nm].

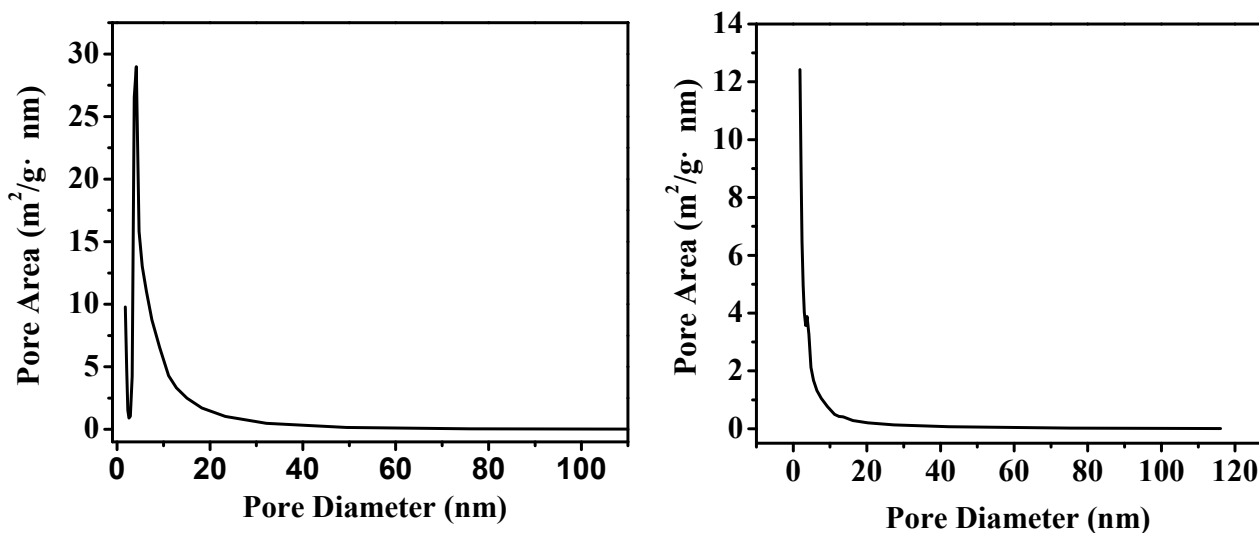

**Fig. S5** Pore surface area of T-HMSNs prepared from cyano- $\text{SiO}_2$ @thiol- $\text{SiO}_2$ (left) and vinyl- $\text{SiO}_2$ @thiol- $\text{SiO}_2$  (right)
